# Supplementary material
Source: PubMed Central journal article supplement (PMC1413836)

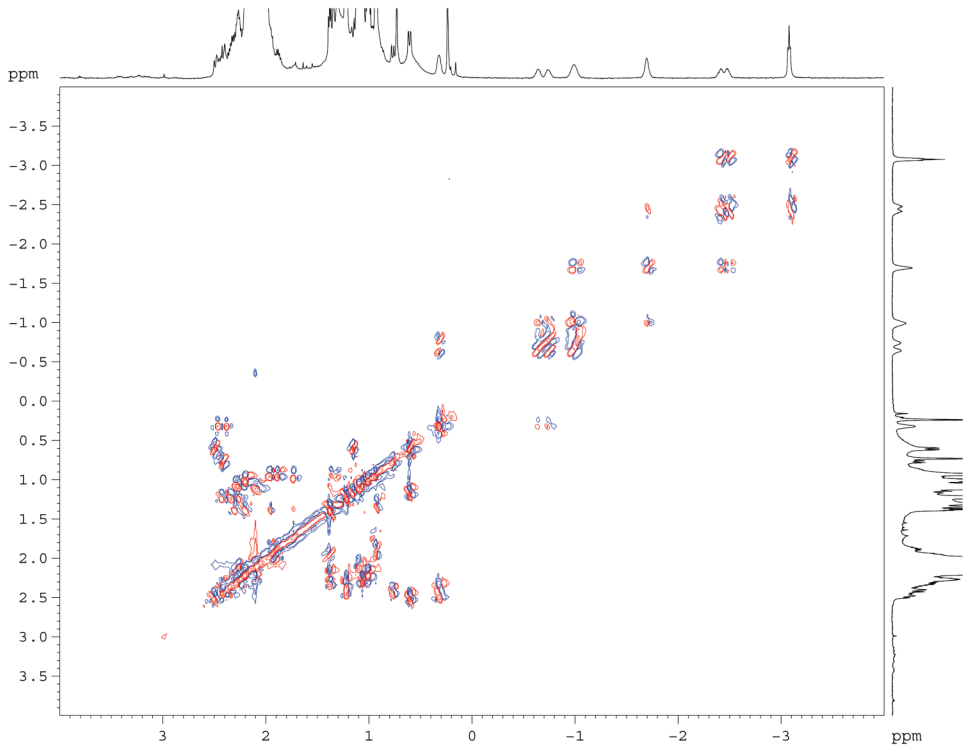

Supplement: pnas_0511149103_1.pdf [file pnas_0511149103_1.pdf]

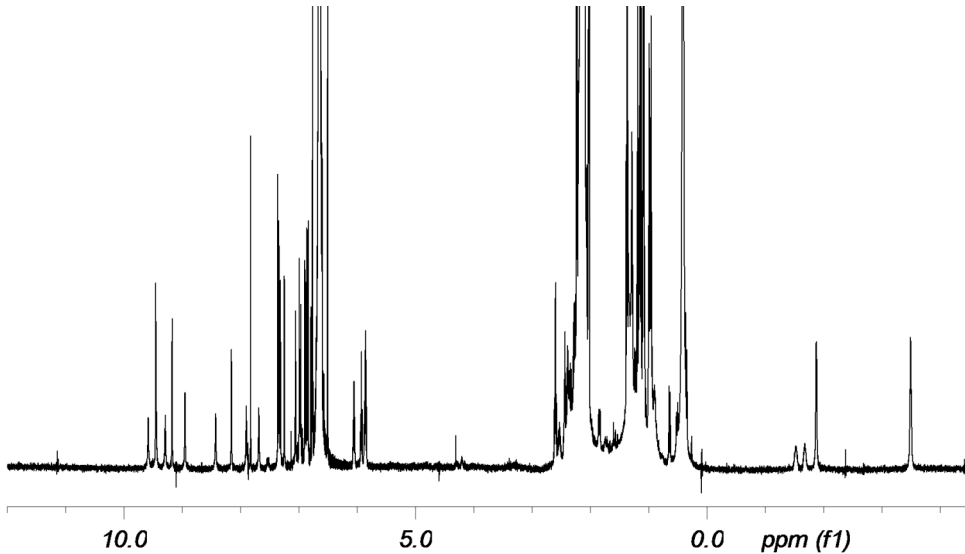

Supplement: pnas_0511149103_10.pdf [file pnas_0511149103_10.pdf]

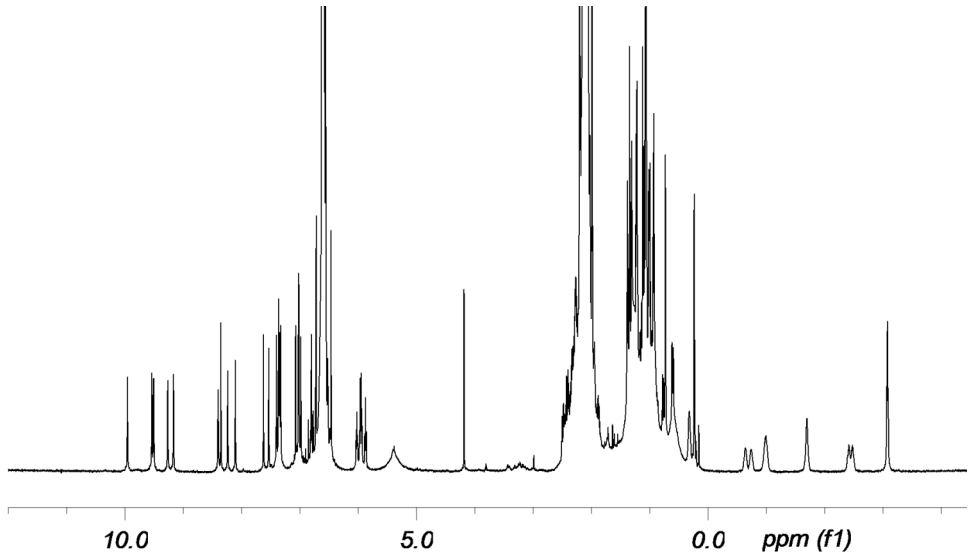

Supplement: pnas_0511149103_11.pdf [file pnas_0511149103_11.pdf]

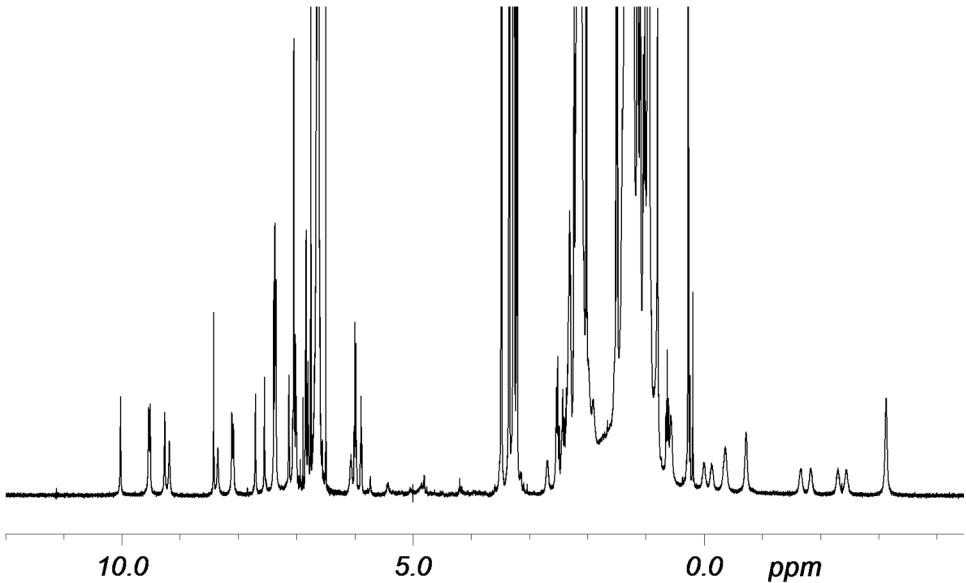

Supplement: pnas_0511149103_12.pdf [file pnas_0511149103_12.pdf]

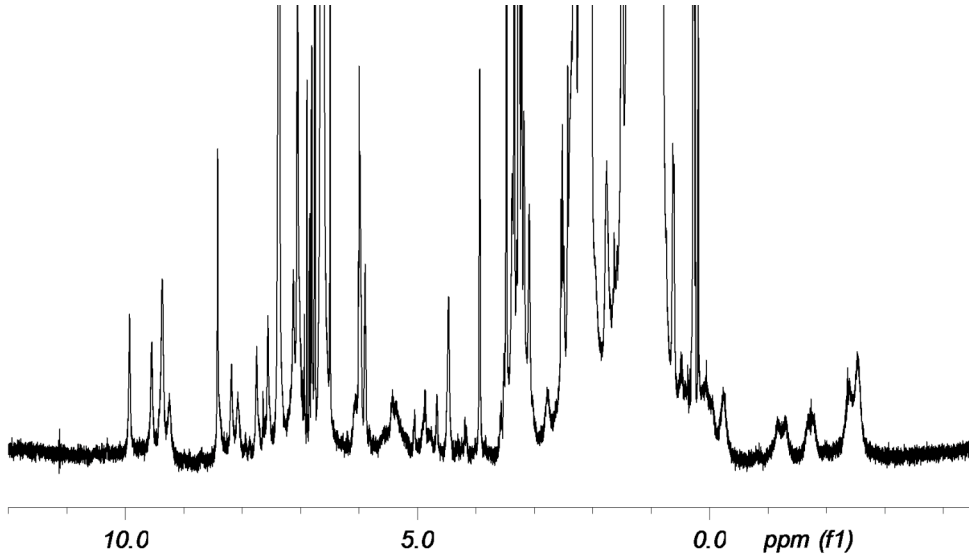

Supplement: pnas_0511149103_13.pdf [file pnas_0511149103_13.pdf]

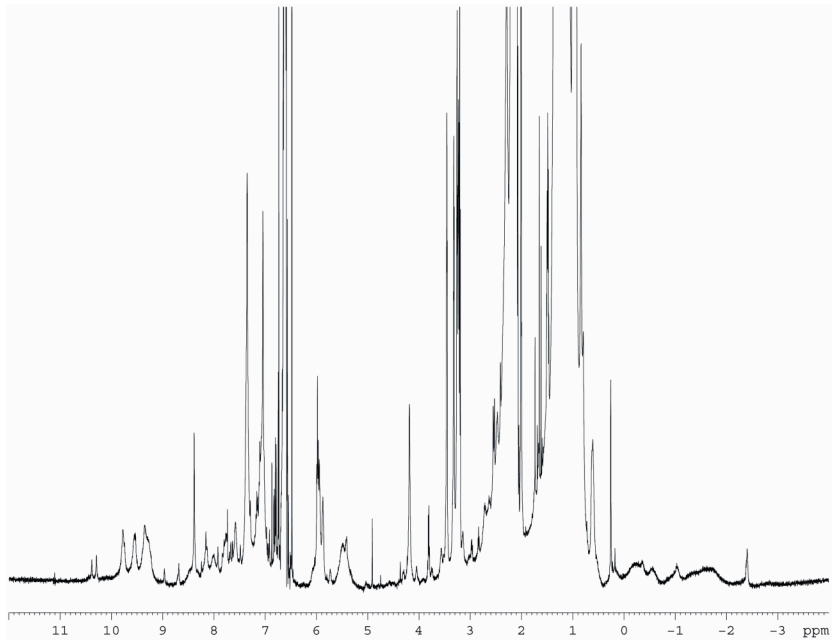

Supplement: pnas_0511149103_14.pdf [file pnas_0511149103_14.pdf]

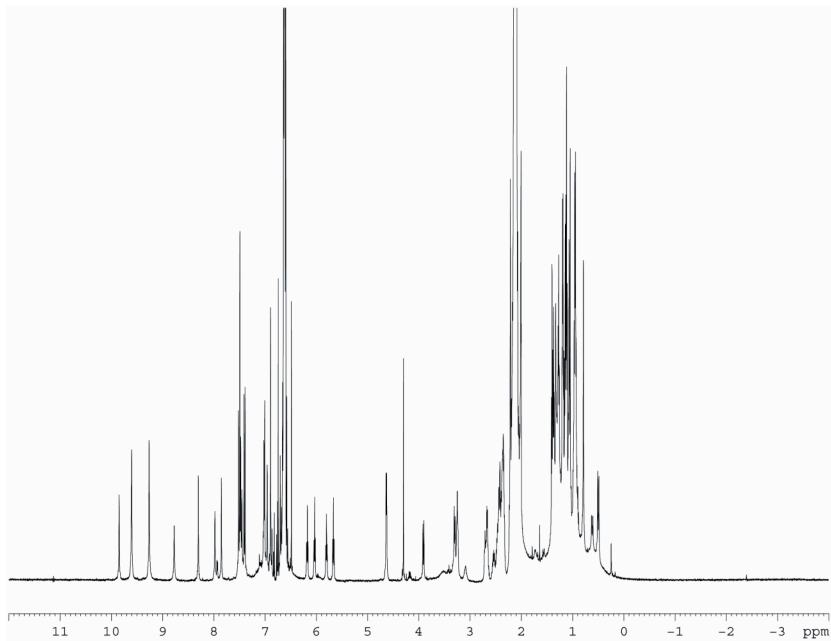

Supplement: pnas_0511149103_15.pdf [file pnas_0511149103_15.pdf]

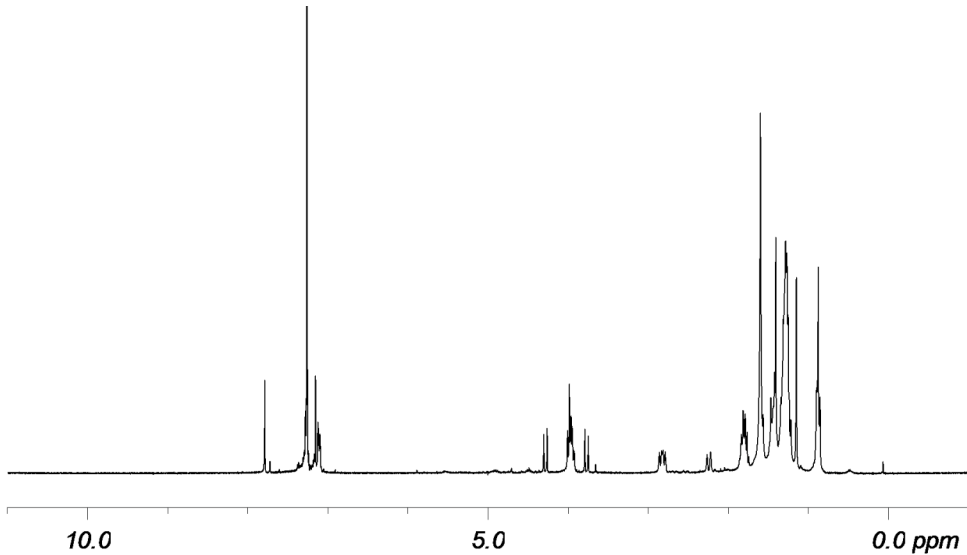

Supplement: pnas_0511149103_16.pdf [file pnas_0511149103_16.pdf]

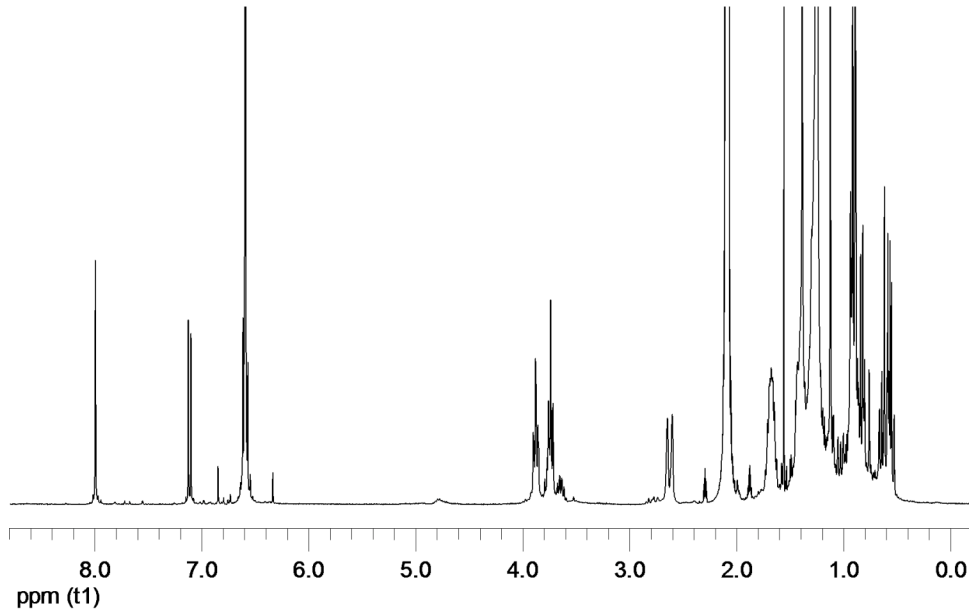

Supplement: pnas_0511149103_17.pdf [file pnas_0511149103_17.pdf]

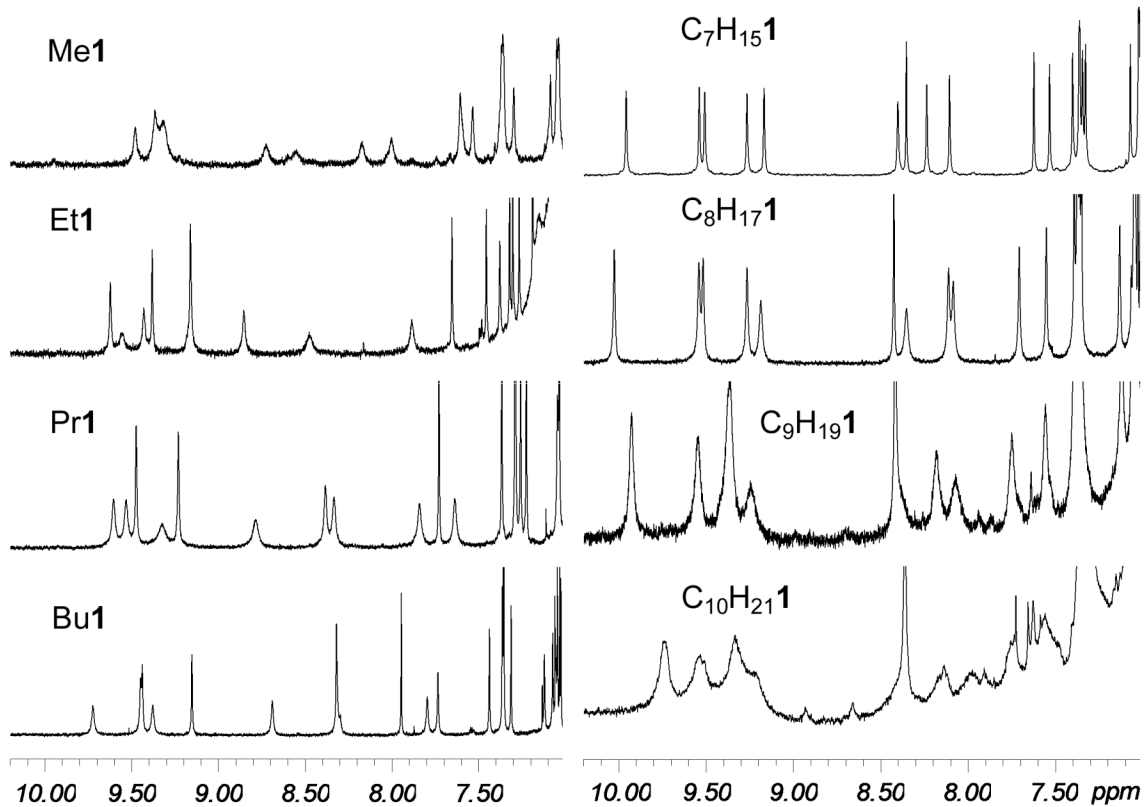

Supplement: pnas_0511149103_2.pdf [file pnas_0511149103_2.pdf]

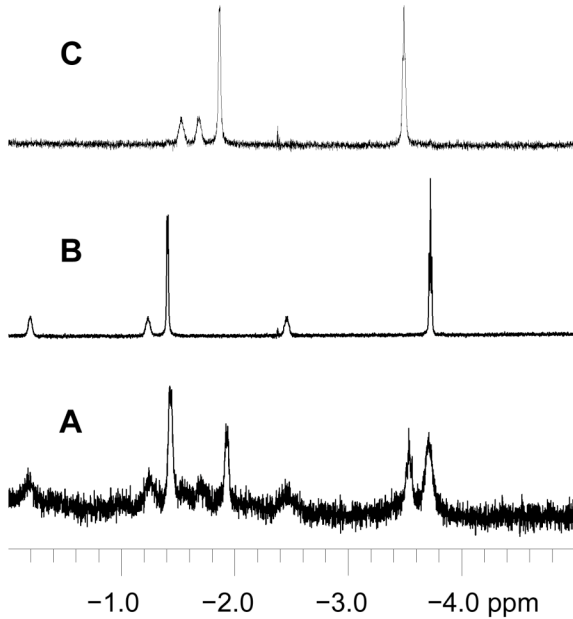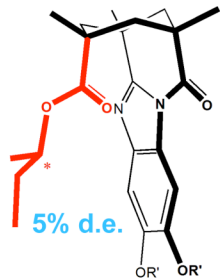

s-Bu2

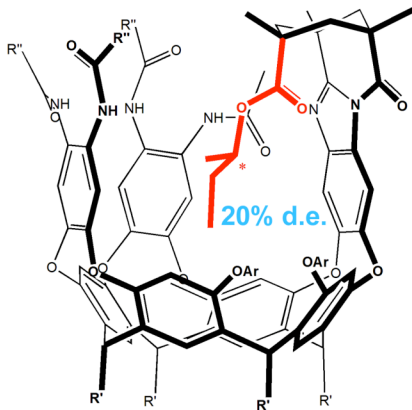

s-Bu1

Supplement: pnas_0511149103_3.pdf [file pnas_0511149103_3.pdf]

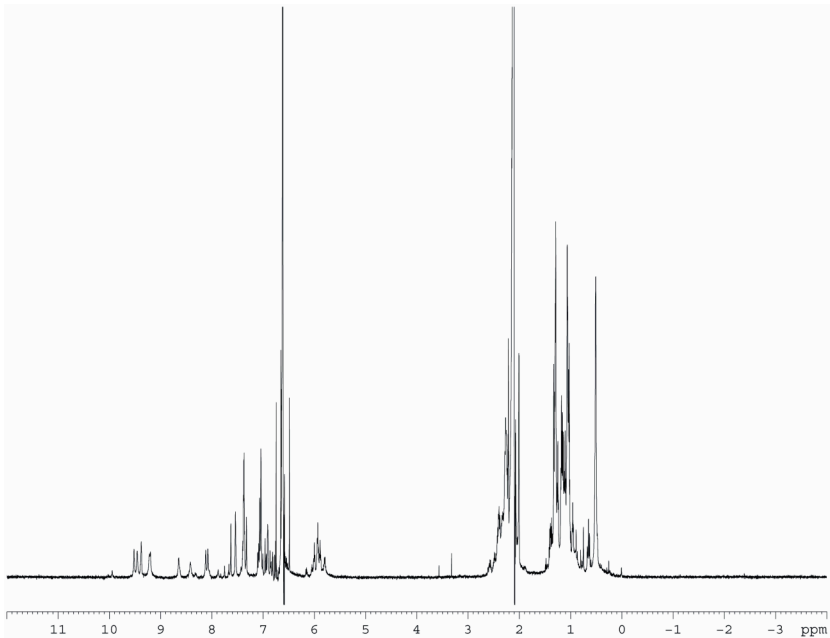

Supplement: pnas_0511149103_4.pdf [file pnas_0511149103_4.pdf]

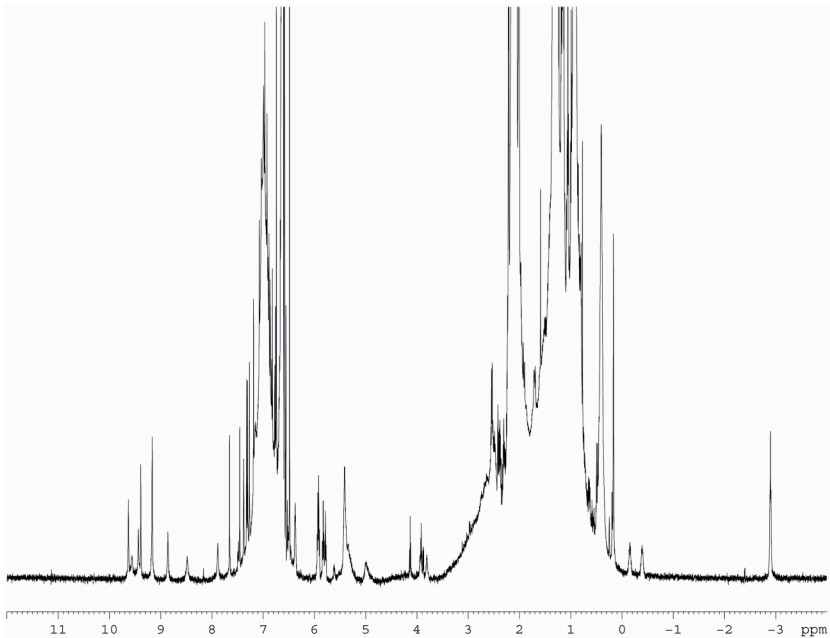

Supplement: pnas_0511149103_5.pdf [file pnas_0511149103_5.pdf]

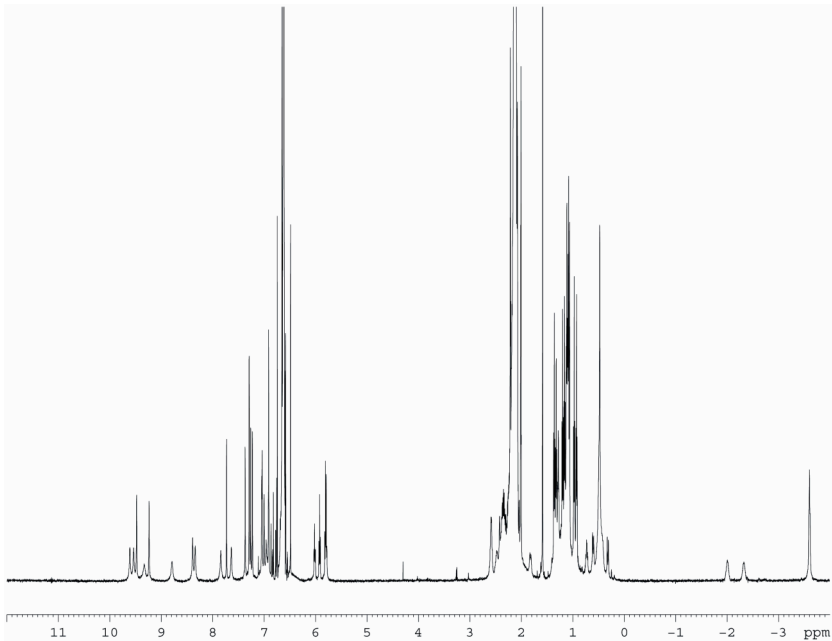

Supplement: pnas_0511149103_6.pdf [file pnas_0511149103_6.pdf]

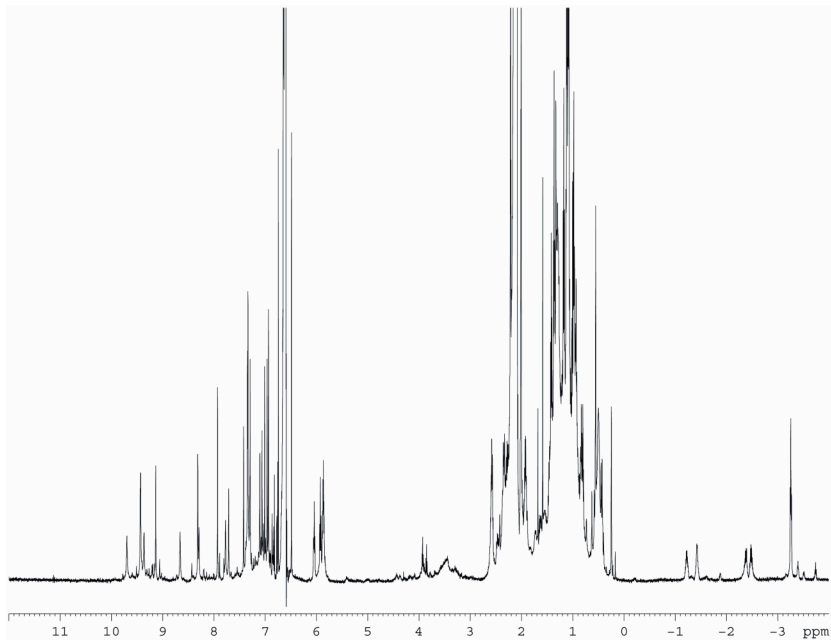

Supplement: pnas_0511149103_7.pdf [file pnas_0511149103_7.pdf]

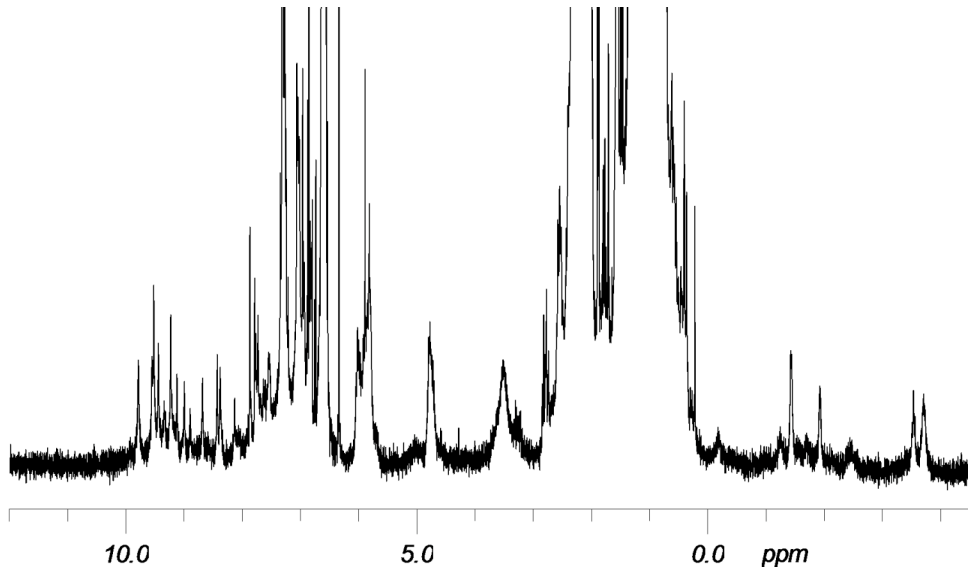

Supplement: pnas_0511149103_8.pdf [file pnas_0511149103_8.pdf]

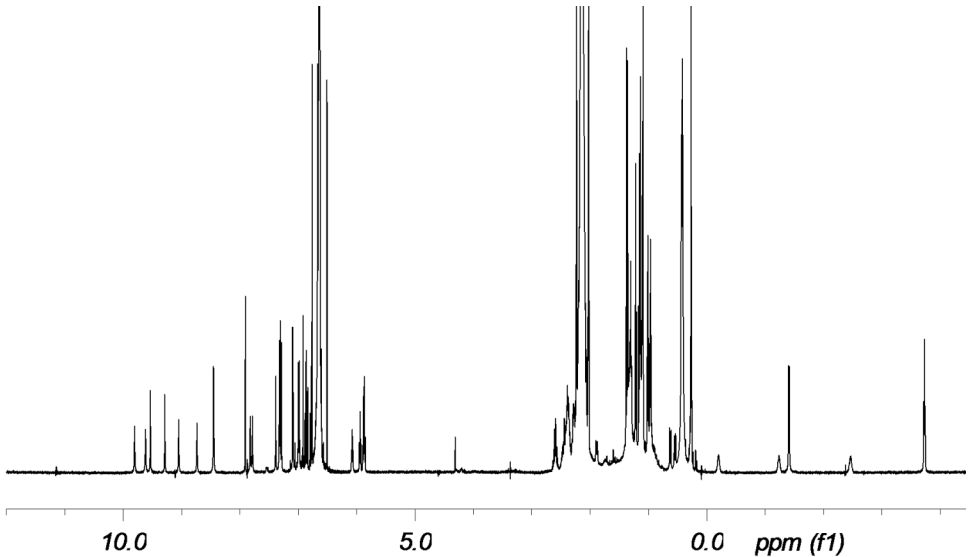

Supplement: pnas_0511149103_9.pdf [file pnas_0511149103_9.pdf]
